# Supplementary material
Source: Research Square preprint supplement (doi:10.21203/rs.3.rs-9707798/v1)
Supplement: Supplementary file 1 [file 252b1424a47c1002a2fe7780.docx]

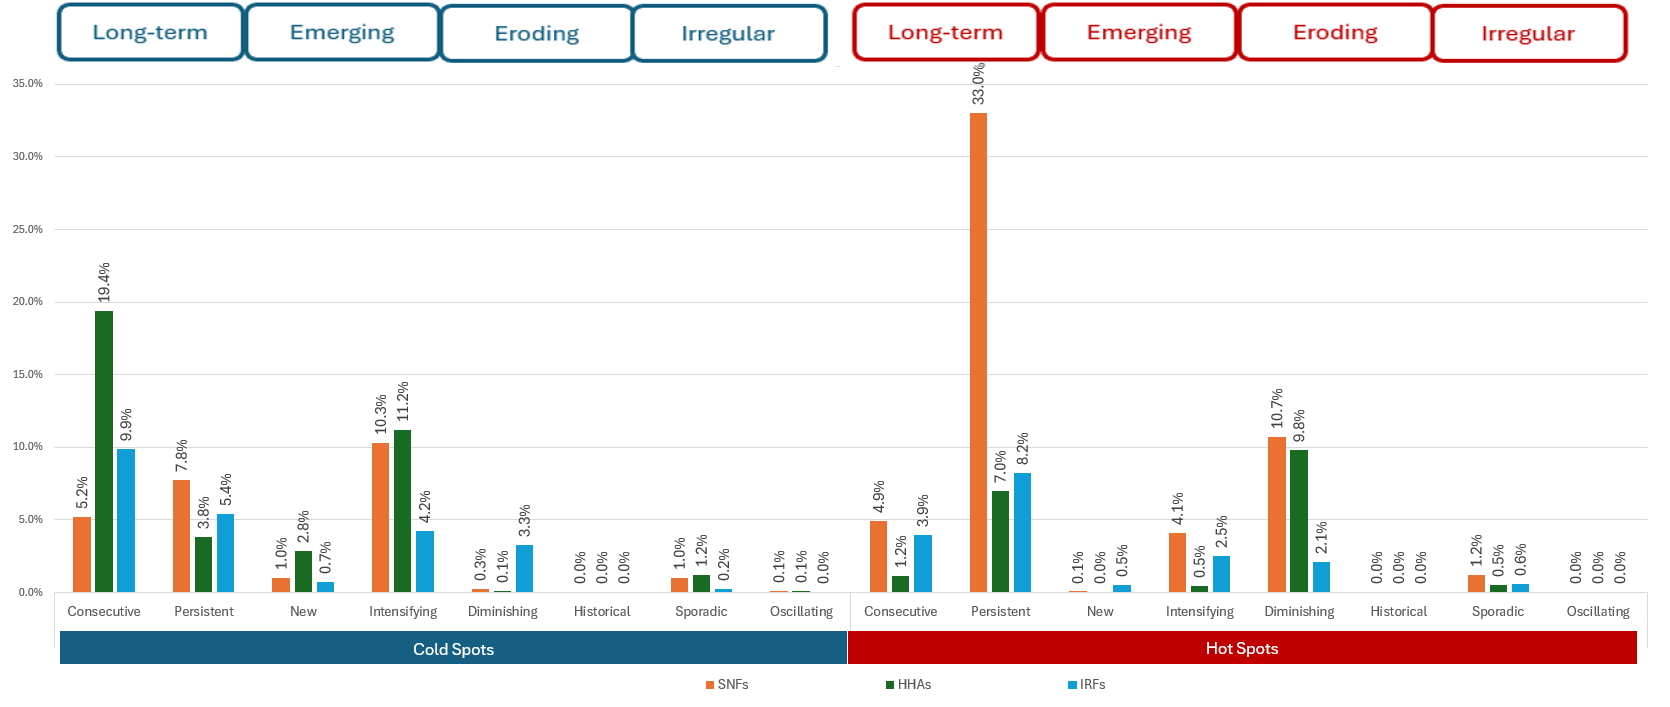


**Supplementary Figure 1:** Percentage of *cold* and *hot spots* of postacute therapy utilization identified within the continental USA, per the original eight spatiotemporal trends for each provider type.

*Legend*: SNF: Skilled Nursing Facilities; IRF: Inpatient Rehabilitation Facilities; HHAs: Home Health Agencies.
