# Supplementary material
Source: Research Square preprint supplement (doi:10.21203/rs.3.rs-9707798/v1)

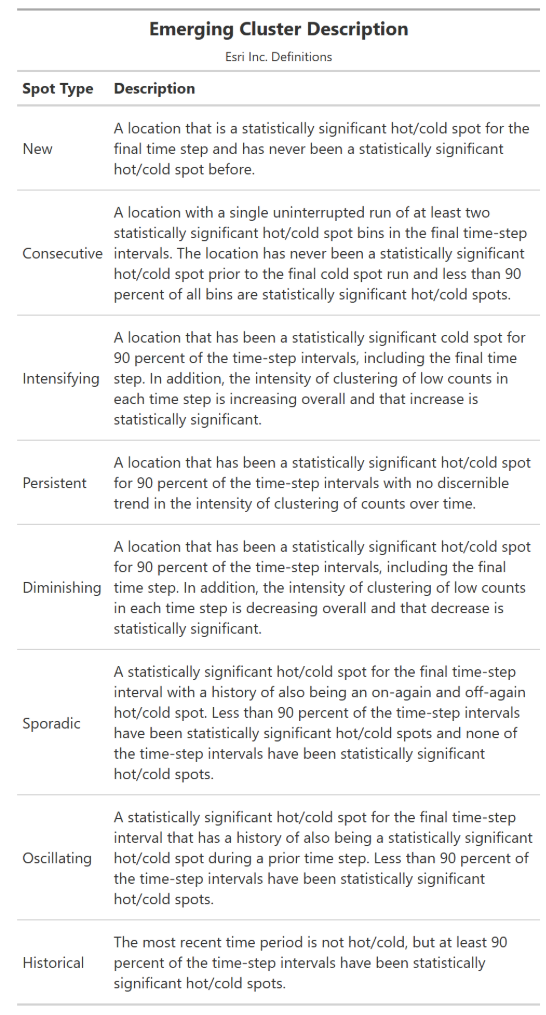


**Supplementary table 1:** Definitions of types of spatiotemporal *hot* and *cold spots*.

Supplement: Supplementary file 2 [file 272817596ebf9ee77580a207.docx]
